# Supplementary material for: Genomic Insights into the Evolution of Carnivory in the Giant Butterwort, Pinguicula gigantea: Chromosome-Level Assembly and Phylogenomic Analysis
Source: bioRxiv preprint, doi:10.1101/2025.04.05.646448, version 1 (2025-04-06)
Supplement: Supplementary tables [file 646448_file03.xlsx]

## Sheet: Table S1
										BUSCO-5.5.0 - embryophyta_odb10
										Complete						Fragmented		Missing		TOTAL
			Assembly		QUAST-5.2.0					All		Single-copy		Duplicated
	Order	Family		Data availability	Total Length	# contigs	Largest contig	N50	L50	#	%	#	%	#	%	#	%	#	%		Citation	Note
1	Ericales	Roridulaceae	Roridula gorgonias	Genome, Annotation	284227596	20615	191047	46984	2209	1409	0.873	1353	0.838	56	0.035	148	0.092	57	0.035	1614	Hartmann, S., Preick, M., Abelt, S., Scheffel, A. and Hofreiter, M., 2020. Annotated genome sequences of the carnivorous plant Roridula gorgonias and a non-carnivorous relative, Clethra arborea. BMC research notes, 13(1), pp.1-6.
2	Ericales	Sarraceniaceae	Darlingtonia californica	Genome	404104574	143066	71692	5514	19353	68	0.042	63	0.039	5	0.003	45	0.028	1501	0.93	1614	Procko, C., Chory, J. and Pirro, S., 2023. The Genome Sequences of 17 Species of Carnivorous Plants. Biodiversity genomes.
3	Ericales	Sarraceniaceae	Heliamphora ciliata	Genome	894468950	451303	5583217	3167	48442	288	0.178	283	0.175	5	0.003	517	0.32	809	0.502	1614	Procko, C., Chory, J. and Pirro, S., 2023. The Genome Sequences of 17 Species of Carnivorous Plants. Biodiversity genomes.
4	Ericales	Sarraceniaceae	Heliamphora exappendiculata	Genome	1355009549	489108	28266782	13685	16099	1247	0.772	1208	0.748	39	0.024	281	0.174	86	0.054	1614	Procko, C., Chory, J. and Pirro, S., 2023. The Genome Sequences of 17 Species of Carnivorous Plants. Biodiversity genomes.
5	Ericales	Sarraceniaceae	Heliamphora pulchella	Genome	992772932	226020	14164309	10594	18072	1007	0.624	991	0.614	16	0.01	426	0.264	181	0.112	1614	Procko, C., Chory, J. and Pirro, S., 2023. The Genome Sequences of 17 Species of Carnivorous Plants. Biodiversity genomes.
6	Ericales	Sarraceniaceae	Sarracenia alabamensis	Genome	828727520	565406	2688456	1828	118654	175	0.108	167	0.103	8	0.005	350	0.217	1089	0.675	1614	Procko, C., Chory, J. and Pirro, S., 2023. The Genome Sequences of 17 Species of Carnivorous Plants. Biodiversity genomes.
7	Ericales	Sarraceniaceae	Sarracenia alata	Genome	3161639272	122084	1163788	35633	24808	1193	0.739	1067	0.661	126	0.078	249	0.154	172	0.107	1614	Procko, C., Chory, J. and Pirro, S., 2023. The Genome Sequences of 17 Species of Carnivorous Plants. Biodiversity genomes.
8	Ericales	Sarraceniaceae	Sarracenia flava	Genome	921451109	587048	4232690	1976	126364	269	0.166	259	0.16	10	0.006	529	0.328	816	0.506	1614	Procko, C., Chory, J. and Pirro, S., 2023. The Genome Sequences of 17 Species of Carnivorous Plants. Biodiversity genomes.
9	Ericales	Sarraceniaceae	Sarracenia leucophylla	Genome	836733871	576670	2539103	1794	123177	151	0.094	145	0.09	6	0.004	331	0.205	1132	0.701	1614	Procko, C., Chory, J. and Pirro, S., 2023. The Genome Sequences of 17 Species of Carnivorous Plants. Biodiversity genomes.
10	Ericales	Sarraceniaceae	Sarracenia minor	Genome	670239117	480512	1524340	1714	104154	60	0.037	58	0.036	2	0.001	216	0.134	1338	0.829	1614	Procko, C., Chory, J. and Pirro, S., 2023. The Genome Sequences of 17 Species of Carnivorous Plants. Biodiversity genomes.
11	Ericales	Sarraceniaceae	Sarracenia psittacina	Genome	809482135	593740	2600409	1628	136220	112	0.069	107	0.066	5	0.003	373	0.231	1129	0.7	1614	Procko, C., Chory, J. and Pirro, S., 2023. The Genome Sequences of 17 Species of Carnivorous Plants. Biodiversity genomes.
12	Ericales	Sarraceniaceae	Sarracenia purpurea	Genome	764972960	539434	2203281	1738	117912	79	0.049	76	0.047	3	0.002	253	0.157	1282	0.794	1614	Procko, C., Chory, J. and Pirro, S., 2023. The Genome Sequences of 17 Species of Carnivorous Plants. Biodiversity genomes.
13	Lamiales	Lentibulariaceae	Genlisea aurea	Genome, Annotation	43357795	10684	169254	5786	2092	1126	0.698	1115	0.691	11	0.007	228	0.141	260	0.161	1614	Leushkin, E.V., Sutormin, R.A., Nabieva, E.R., Penin, A.A., Kondrashov, A.S. and Logacheva, M.D., 2013. The miniature genome of a carnivorous plant Genlisea aurea contains a low number of genes and short non-coding sequences. BMC genomics, 14, pp.1-11.
14	Lamiales	Lentibulariaceae	Genlisea hispidula*	Genome, Annotation	203800000	95804	-	27310	2300	-	-	-	-	-	-	-	-	-	-	-	Vu, G.T., Schmutzer, T., Bull, F., Cao, H.X., Fuchs, J., Tran, T.D., Jovtchev, G., Pistrick, K., Stein, N., Pecinka, A. and Neumann, P., 2015. Comparative genome analysis reveals divergent genome size evolution in a carnivorous plant genus. The Plant Genome, 8(3), pp.plantgenome2015-04.
15	Lamiales	Lentibulariaceae	Genlisea nigrocaulis*	Genome, Annotation	64930000	6968	-	173700	113	-	-	-	-	-	-	-	-	-	-	-	Vu, G.T., Schmutzer, T., Bull, F., Cao, H.X., Fuchs, J., Tran, T.D., Jovtchev, G., Pistrick, K., Stein, N., Pecinka, A. and Neumann, P., 2015. Comparative genome analysis reveals divergent genome size evolution in a carnivorous plant genus. The Plant Genome, 8(3), pp.plantgenome2015-04.
16	Lamiales	Lentibulariaceae	Pinguicula moranensis	Genome	816101522	255161	1592721	5325	40354	1020	0.632	850	0.527	170	0.105	372	0.23	222	0.138	1614	Procko, C., Chory, J. and Pirro, S., 2023. The Genome Sequences of 17 Species of Carnivorous Plants. Biodiversity genomes.
	Lamiales	Lentibulariaceae	Pinguicula primuliflora	Genome	404192229	92717	2235986	8776	11930	1409	0.873	1285	0.796	124	0.077	116	0.072	89	0.055	1614	Procko, C., Chory, J. and Pirro, S., 2023. The Genome Sequences of 17 Species of Carnivorous Plants. Biodiversity genomes.
	Lamiales	Lentibulariaceae	Utricularia gibba	Genome, Annotation	100232236	516	8502017	3446356	10	1508	0.934	1464	0.907	44	0.027	28	0.017	78	0.049	1614	Lan, T., Renner, T., Ibarra-Laclette, E., Farr, K.M., Chang, T.H., Cervantes-Pérez, S.A., Zheng, C., Sankoff, D., Tang, H., Purbojati, R.W. and Putra, A., 2017. Long-read sequencing uncovers the adaptive topography of a carnivorous plant genome. Proceedings of the National Academy of Sciences, 114(22), pp.E4435-E4441.
	Lamiales	Lentibulariaceae	Utricularia reniformis	Genome, Annotation	304550249	1830	1862935	488004	183	1475	0.914	1047	0.649	428	0.265	32	0.02	107	0.066	1614	Silva, S.R., Moraes, A.P., Penha, H.A., Julião, M.H., Domingues, D.S., Michael, T.P., Miranda, V.F. and Varani, A.M., 2019. The terrestrial carnivorous plant Utricularia reniformis sheds light on environmental and life-form genome plasticity. International journal of molecular sciences, 21(1), p.3.
17	Nepenthales	Droseraceae	Aldrovanda vesiculosa	Genome, Annotation	420285881	2408	3421599	313727	310	1517	0.94	1366	0.846	151	0.094	28	0.017	69	0.043	1614	Palfalvi, G., Hackl, T., Terhoeven, N., Shibata, T.F., Nishiyama, T., Ankenbrand, M., Becker, D., Förster, F., Freund, M., Iosip, A. and Kreuzer, I., 2020. Genomes of the Venus flytrap and close relatives unveil the roots of plant carnivory. Current Biology, 30(12), pp.2312-2320.
18	Nepenthales	Droseraceae	Dionaea muscipula	Genome	605730051	234133	412882	3876	42683	931	0.577	915	0.567	16	0.01	426	0.264	257	0.159	1614	Procko, C., Chory, J. and Pirro, S., 2023. The Genome Sequences of 17 Species of Carnivorous Plants. Biodiversity genomes.	Not publically available
19	Nepenthales	Droseraceae	Dionaea muscipula*	Genome, Annotation	1500000000	104847	1000000	35000	-	-	0.836	-	0.805	-	0.031	-	-	-	-	-	Palfalvi, G., Hackl, T., Terhoeven, N., Shibata, T.F., Nishiyama, T., Ankenbrand, M., Becker, D., Förster, F., Freund, M., Iosip, A. and Kreuzer, I., 2020. Genomes of the Venus flytrap and close relatives unveil the roots of plant carnivory. Current Biology, 30(12), pp.2312-2320.	2/3 corrupted files
20	Nepenthales	Droseraceae	Drosera capensis	Genome	263058917	10821	405366	82717	941	1490	0.923	1122	0.695	368	0.228	50	0.031	74	0.046	1614	Butts, C.T., Bierma, J.C. and Martin, R.W., 2016. Novel proteases from the genome of the carnivorous plant Drosera capensis: structural prediction and comparative analysis. Proteins: Structure, Function, and Bioinformatics, 84(10), pp.1517-1533.
21	Nepenthales	Droseraceae	Drosera spatulata	Genome, Annotation	237783380	1061	3359042	705355	101	1524	0.945	1478	0.916	46	0.029	25	0.015	65	0.04	1614	Palfalvi, G., Hackl, T., Terhoeven, N., Shibata, T.F., Nishiyama, T., Ankenbrand, M., Becker, D., Förster, F., Freund, M., Iosip, A. and Kreuzer, I., 2020. Genomes of the Venus flytrap and close relatives unveil the roots of plant carnivory. Current Biology, 30(12), pp.2312-2320.
22	Nepenthales	Droseraceae	Drosera spatulata (decontamination_FSCR)	Genome	449008788	76100	172028	17213	7577	1252	0.776	660	0.409	592	0.367	199	0.123	163	0.101	1614	Procko, C., Chory, J. and Pirro, S., 2023. The Genome Sequences of 17 Species of Carnivorous Plants. Biodiversity genomes.
23	Nepenthales	Droseraceae	Drosera spatulata (decontamination_gx)	Genome	447992064	74690	172028	17258	7548	1252	0.776	660	0.409	592	0.367	199	0.123	163	0.101	1614	Procko, C., Chory, J. and Pirro, S., 2023. The Genome Sequences of 17 Species of Carnivorous Plants. Biodiversity genomes.	Not publically available
24	Nepenthales	Droseraceae	Drosera spatulata (spades_01)	Genome	449110370	76199	172069	17209	7580	1252	0.776	660	0.409	592	0.367	199	0.123	163	0.101	1614	Procko, C., Chory, J. and Pirro, S., 2023. The Genome Sequences of 17 Species of Carnivorous Plants. Biodiversity genomes.
25	Nepenthales	Droseraceae	Drosera spatulata (zanfona_1)	Genome	448040157	74387	973527	17381	7365	1252	0.776	660	0.409	592	0.367	198	0.123	164	0.101	1614	Procko, C., Chory, J. and Pirro, S., 2023. The Genome Sequences of 17 Species of Carnivorous Plants. Biodiversity genomes.
26	Nepenthales	Droseraceae	Drosera tokaiensis	Genome	-	-	-	-	-	-	-	-	-	-	-	-	-	-	-	-	Procko, C., Chory, J. and Pirro, S., 2023. The Genome Sequences of 17 Species of Carnivorous Plants. Biodiversity genomes.
27	Nepenthales	Droseraceae	Nepenthes alata	Genome	948146422	170420	102538	6836	40621	985	0.61	962	0.596	23	0.014	430	0.266	199	0.124	1614	Procko, C., Chory, J. and Pirro, S., 2023. The Genome Sequences of 17 Species of Carnivorous Plants. Biodiversity genomes.
28	Nepenthales	Droseraceae	Nepenthes gracilis (female_HiC)	Genome, Annotation	757462774	1669	47308813	16168190	15	1548	0.959	1517	0.94	31	0.019	24	0.015	42	0.026	1614	Saul, F., Scharmann, M., Wakatake, T., Rajaraman, S., Marques, A., Freund, M., Bringmann, G., Channon, L., Becker, D., Carroll, E. and Low, Y.W., 2023. Subgenome dominance shapes novel gene evolution in the decaploid pitcher plant Nepenthes gracilis. Nature plants, pp.1-16.
29	Nepenthales	Droseraceae	Nepenthes gracilis (female_SPA)	Genome, Annotation	757016474	1801	32458460	15051313	18	1550	0.96	1519	0.941	31	0.019	23	0.014	41	0.026	1614	Saul, F., Scharmann, M., Wakatake, T., Rajaraman, S., Marques, A., Freund, M., Bringmann, G., Channon, L., Becker, D., Carroll, E. and Low, Y.W., 2023. Subgenome dominance shapes novel gene evolution in the decaploid pitcher plant Nepenthes gracilis. Nature plants, pp.1-16.
	Nepenthales	Droseraceae	Nepenthes gracilis (male_HiC)	Genome, Annotation	752878903	176	32212346	18633394	16	1564	0.969	1537	0.952	27	0.017	15	0.009	35	0.022	1614	Saul, F., Scharmann, M., Wakatake, T., Rajaraman, S., Marques, A., Freund, M., Bringmann, G., Channon, L., Becker, D., Carroll, E. and Low, Y.W., 2023. Subgenome dominance shapes novel gene evolution in the decaploid pitcher plant Nepenthes gracilis. Nature plants, pp.1-16.
	Nepenthales	Droseraceae	Nepenthes mirabilis	Genome, Annotation	684191417	140542	312611	10440	17371	1564	0.969	1543	0.956	21	0.013	28	0.017	22	0.014	1614	Gao, Y., Liao, H.B., Liu, T.H., Wu, J.M., Wang, Z.F. and Cao, H.L., 2023. Draft genome and transcriptome of Nepenthes mirabilis, a carnivorous plant in China. BMC Genomic Data, 24(1), pp.1-5.
	Oxalidales	Cephalotaceae	Cephalotus follicularis	Genome, Annotation	1614517073	16307	2219130	287498	1634	1564	0.969	1536	0.952	28	0.017	20	0.012	30	0.019	1614	Fukushima, K., Fang, X., Alvarez-Ponce, D., Cai, H., Carretero-Paulet, L., Chen, C., Chang, T.H., Farr, K.M., Fujita, T., Hiwatashi, Y. and Hoshi, Y., 2017. Genome of the pitcher plant Cephalotus reveals genetic changes associated with carnivory. Nature Ecology & Evolution, 1(3), p.0059.	broken download links
			*incomplete assembly stats and BUSCO-3.0.1 reported from paper. BUSCO library unknown. Genome not available
			**kmergenie & Genomescope genome size estimates
	Table S1: Assembly statistics for all currently published carnivorous plant genomes.

## Sheet: Table S2
	Sample:	Pinguicula agnata	Pinguicula gigantea	Pinguicula grandiflora	Pinguicula moctezumea
	Mean read length:	3159.6	6182.2	6073	4353
	Mean read quality:	4.5	4.5	4.7	3.7
	Median read length:	693	1054	1003	475
	Median read quality:	6.5	7.8	8.1	6.6
	Number of reads:	12613739	8977265	4683883	12121023
	Read length N50:	17455	35854	37878	37492
	STDEV read length:	9290.7	15575	15970.9	13981
	Total bases:	39854418704	55499618859	28445068544	52762913837
	Number, percentage and megabases of reads above quality cutoffs
	>Q5:	7,595,419 (60.2%) 35,936.9Mb	5,717,918 (63.7%) 53,666.1Mb	3,056,966 (65.3%) 27,323.3Mb	6,645,105 (54.8%) 51,079.5Mb
	>Q7:	5,642,850 (44.7%) 29,520.7Mb	5,083,132 (56.6%) 49,929.4Mb	2,739,494 (58.5%) 25,530.5Mb	5,788,893 (47.8%) 46,858.8Mb
	>Q10:	1,131,951 (9.0%) 3,677.1Mb	1,009,882 (11.2%) 4,924.0Mb	982,621 (21.0%) 8,000.4Mb	1,077,817 (8.9%) 4,346.0Mb
	>Q12:	10,730 (0.1%) 14.2Mb	7,114 (0.1%) 15.0Mb	5,766 (0.1%) 8.4Mb	5,720 (0.0%) 5.7Mb
	>Q15:	0 (0.0%) 0.0Mb	0 (0.0%) 0.0Mb	0 (0.0%) 0.0Mb	0 (0.0%) 0.0Mb
	Top 5 highest mean basecall quality scores and their read lengths
	1:	14.3 (836)	14.4 (397)	13.9 (417)	14.1 (243)
	2:	13.8 (382)	14.3 (9485)	13.8 (967)	13.9 (304)
	3:	13.8 (446)	14.1 (350)	13.5 (332)	13.8 (475)
	4:	13.8 (1013)	13.9 (608)	13.4 (704)	13.8 (813)
	5:	13.8 (404)	13.7 (395)	13.4 (326)	13.7 (585)
	Top 5 longest reads and their mean basecall quality score
	1:	342,856 (7.8)	353,289 (9.5)	399398 (10.3)	428192 (8.6)
	2:	284,225 (9.2)	336,986 (9.5)	351154 (9.5)	406161 (8.6)
	3:	282,177 (9.8)	327,957 (8.9)	332438 (9.4)	405857 (8.9)
	4:	255,830 (9.0)	301,207 (8.9)	305844 (10.5)	371366 (8.0)
	5:	254,299 (8.9)	299,190 (9.2)	301345 (9.4)	368168 (8.2)
	Table S2: ONT read stats for four long-read assemblies.

## Sheet: Table S3
	Species	Pinguicula agnata		Pinguicula gigantea		Pinguicula grandiflora		Pinguicula moctezumae
	paired end read	Forward	Reverse	Forward	Reverse	Forward	Reverse	Forward	Reverse
	Encoding	Illumina 1.9/Sanger		Illumina 1.9/Sanger		Illumina 1.9/Sanger		Illumina 1.9/Sanger
	Total Sequences	38806442	38806442	34842842	34842842	40266500	40266500	37551390	37551390
	Sequences flagged as poor quality	0	0	0	0	0	0	0	0
	Sequence length	251	251	251	251	251	251	251	251
	%GC	39	39	38	38	35	35	39	39
	Table S3: Illumina paired-end read statistics for the four long-read assemblies.

## Sheet: Table S4
	Species	Sample	Nanodrop ng/ul	260/280	260/230	QUBIT ng/ul
	P. gigantea	Replicate 1	461.8	2.13	1.76	359
	P. gigantea	Replicate 2	563.2	2.09	1.59	388
	P. gigantea	Replicate 3	1642.3	2.2	1.9	376
	P. grandiflora	Replicate 1	498.4	2.18	1.83	416
	P. grandiflora	Replicate 2	987.7	2.13	1.62	389
	P. grandiflora	Replicate 3	990.3	2.1	1.39	54
	Table S4: RNAseq Nanodrop and QUBIT statistics.

## Sheet: Table S5
		Pinguicula gigantea			Pinguicula grandiflora
	Assembly	Primary assembly	Purged assembly	Dovetail assembly	Primary assembly	Dovetail assembly
	# contigs	884	405	21	1879	1517
	Largest contig	23395389	23395389	68727999	4090467	36635654
	Total length	706652479	608722795	608762877	539260414	570726228
	GC (%)	38.1	38.07	38.07	36.92	36.51
	N50	2212735	2572827	55942523	404361	598681
	L50	71	50	5	349	102
	# N's per 100 kbp	0	0	6.59	0	6.47
	Complete BUSCOs	1573 (97.5%)	1563 (96.9%)	1561 (96.8%)	1535 (95.1%)	1509 (93.5%)
	Complete single-copy BUSCOs	1238 (76.7%)	1320 (81.8%)	1331 (82.5%)	797 (49.4%)	827 (51.2%)
	Complete duplicated BUSCOs	335 (20.8%)	243 (15.1%)	230 (14.3%)	738 (45.7%)	682 (42.3%)
	Fragmented BUSCOs	9 (0.6%)	11 (0.7%)	12 (0.7%)	17 (1.1%)	26 (1.6%)
	Missing BUSCOs	32 (1.9%)	40 (2.4%)	41 (2.5%)	62 (3.8%)	79 (4.9%)
	Total BUSCO groups searched	1614	1614	1614	1614	1614
	Annotation
	gene model/mRNA count	48,604/56,145	42,364/49,347	35,940/35,940	43,079/51,601	33,294/33,294
	Complete BUSCOs	1570 (97.3%)	1557 (96.5%)	1490 (92.3%)	1529 (94.7%)	1433 (88.8%)
	Complete single-copy BUSCOs	1247 (77.3%)	1328 (82.3%)	1312 (81.3%)	796 (49.3%)	888 (55.0%)
	Complete duplicated BUSCOs	323 (20%)	229 (14.2%)	178 (11.0%)	733 (45.4%)	545 (33.8%)
	Fragmented BUSCOs	8 (0.5%)	12 (0.7%)	51 (3.2%)	15 (0.9%)	52 (3.2%)
	Missing BUSCOs	36 (2.2%)	45 (2.8%)	73 (4.5%)	70 (4.3%)	129 (8.0%)
	Total BUSCO groups searched	1614	1614	1614	1614	1614
	Table S5: Assembly and annotation statistics before and after Hi-C scaffolding.

## Sheet: Table S6
		Pinguicula agnata		Pinguicula moctezumae
	Assembly	Primary assembly	Purged assembly	Primary assembly	Purged assembly
	# contigs	2105	914	1354	531
	Largest contig	4961421	4961421	11510108	11510108
	Total length	1040088832	676027037	807087207	586152820
	GC (%)	37.95	38.02	38.47	38.46
	N50	803219	1098260	1059073	1838013
	L50	366	187	165	84
	# N's per 100 kbp	0	0	0	0
	Complete BUSCOs	1556 (96.4%)	1507 (93.4%)	1566 (97.0%)	1506 (93.4%)
	Complete single-copy BUSCOs	849 (52.6%)	1278 (79.2%)	1011 (62.6%)	1255 (77.8%)
	Complete duplicated BUSCOs	707 (43.8%)	229 (14.2%)	555 (34.4%)	251 (15.6%)
	Fragmented BUSCOs	14 (0.9%)	27 (1.7%)	12 (0.7%)	26 (1.6%)
	Missing BUSCOs	44 (2.7%)	80 (4.9%)	36 (2.3%)	82 (5%)
	Total BUSCO groups searched	1614	1614	1614	1614
	Annotation
	gene model/mRNA count	57,136/66,128	37,141/43,900	46,853/55,144	33,919/40,555
	Complete BUSCOs	1549 (96%)	1486 (92.1%)	1564 (96.9%)	1481 (91.8%)
	Complete single-copy BUSCOs	874 (54.2%)	1280 (79.3%)	1070 (66.3%)	1250 (77.4%)
	Complete duplicated BUSCOs	675 (41.8%)	206 (12.8%)	494 (30.6%)	231 (14.3%)
	Fragmented BUSCOs	9 (0.6%)	27 (1.7%)	8 (0.5%)	29 (1.8%)
	Missing BUSCOs	56 (3.5%)	101 (6.3%)	42 (2.6%)	104 (6.4%)
	Total BUSCO groups searched	1614	1614	1614	1614
	Table S6: Long-read assembly and annotation statistics.

## Sheet: Table S7
		Assembly																				Annotation
		RagTag							QUAST							BUSCO							BUSCO
	Species	placed seqs	placed bp	unplaced seqs	unplaced bp	gap bp	gap seqs	placed bp %	# contigs	Largest contig	Total length	GC (%)	N50	L50	# N's per 100 kbp	Complete	Single-copy	Duplicated	Fragmented	Missing	Total	gene/mRNA count	Complete	Single-copy	Duplicated	Fragmented	Missing	Total
	Pinguicula agnata	855	668508375	61	7519079	4902592	843	0.988878	71	77459393	680929629	38.02	60447833	5	719.99	1508 (93.5%)	1286 (79.7%)	222 (13.8%)	26 (1.6%)	80 (4.9%)	1614	37155/43913	1486 (92.1%)	1280 (79.3%)	206 (12.8%)	27 (1.7%)	101 (6.3%)	1614
	Pinguicula moctezumae	504	577425218	27	8727602	2971836	492	0.98511	39	63703948	589124656	38.46	53852089	5	504.45	1505 (93.3%)	1273 (78.9%)	232 (14.4%)	27 (1.7%)	82 (5.0%)	1614	33929/40572	1481 (91.8%)	1250 (77.4%)	231 (14.3%)	29 (1.8%)	104 (6.4%)	1614
	Table S7: RagTag assembly and annotation statistics.

## Sheet: Table S8
	Assembly	Pinguicula agnata ONT			Pinguicula gigantea HiC			Pinguicula grandiflora HiC			Pinguicula moctezumae ONT
	sequences:	73			21			1879			39
	total length:	680930046			608762877			539260414			589124656
	total length (excl N/X-runs):	676027454			608722777			539260414			586152820
	GC level:	38.02%			38.07%			36.92%			38.46%
	bases masked:	464,483,268 bp (68.21%)			410686548 bp (67.46%)			380060767 bp (70.48%)			397392049 bp (67.45%)
		# of elements*	length occupied (bp)	% of sequence	# of elements*	length occupied (bp)	% of sequence	# of elements*	length occupied (bp)	% of sequence	# of elements*	length occupied (bp)	% of sequence
	Retroelements	453490	354353742	0.5204	303806	283772775	0.4661	72295	127110141	0.2357	366218	296850358	0.5039
	SINEs:	844	571571	0.0008	1167	364891	0.0006	927	1242315	0.0023	594	932229	0.0016
	Penelope	0	0	0	93	18690	0	91	123967	0.0002	590	81419	0.0001
	LINEs:	78595	48575447	0.0713	71827	47847623	0.0786	21358	26063407	0.0483	67308	44641072	0.0758
	CRE/SLACS	0	0	0	0	0	0	0	0	0	0	0	0
	L2/CR1/Rex	0	0	0	0	0	0	656	128885	0.0002	0	0	0
	R1/LOA/Jockey	0	0	0	0	0	0	79	251251	0.0005	0	0	0
	R2/R4/NeSL	0	0	0	0	0	0	0	0	0	0	0	0
	RTE/Bov-B	2857	2779662	0.0041	3742	4521694	0.0074	0	0	0	1977	2680922	0.0046
	L1/CIN4	75437	45729447	0.0672	68085	43325929	0.0712	20584	25675977	0.0476	62682	40106252	0.0681
	LTR elements:	374051	305206724	0.4482	230812	235560261	0.3869	50010	99804419	0.1851	298316	251277057	0.4265
	BEL/Pao	26	10932	0	0	0	0	0	0	0	0	0	0
	Ty1/Copia	228131	231927611	0.3406	157563	185328201	0.3044	13648	12202332	0.0226	162856	177286007	0.3009
	Gypsy/DIRS1	42657	45447190	0.0667	32748	38631793	0.0635	29242	82535425	0.1531	49058	49091142	0.0833
	Retroviral	594	296215	0.0004	155	27876	0	1130	383611	0.0007	163	103668	0.0002
	DNA transposons	31527	21113108	0.031	42207	27244039	0.0448	10888	4805971	0.0089	34318	24502210	0.0416
	hobo-Activator	19740	13634713	0.02	24193	16700861	0.0274	3963	1369726	0.0025	15888	13459590	0.0228
	Tc1-IS630-Pogo	0	0	0	1032	373752	0.0006	862	356517	0.0007	3065	662917	0.0011
	En-Spm	0	0	0	0	0	0	0	0	0	0	0	0
	MuDR-IS905	3389	2704161	0.004	3666	2592422	0.0043	2145	1408739	0.0026	5361	3791839	0.0064
	PiggyBac	0	0	0	0	0	0	0	0	0	0	0	0
	Tourist/Harbinger	7122	4357849	0.0064	10060	6602998	0.0108	2255	979516	0.0018	10004	6587864	0.0112
	Other**	0	0	0	0	0	0	0	0	0	0	0	0
	Rolling-circles	2023	1595501	0.0023	2730	1129818	0.0019	0	0	0	2926	1977495	0.0034
	Unclassified:	352034	82475660	0.1211	417655	94544835	0.1553	202183	232384579	0.4309	294723	68675877	0.1166
	Total interspersed repeats:		457942510	0.6725		405580339	0.6662		364424658	0.6758		390109864	0.6622
	Small RNA:	4723	1783742	0.0026	4810	973810	0.0016	6825	14560873	0.027	4455	2731257	0.0046
	Satellites:	21	4389	0	0	0	0	0	0	0	0	0	0
	Simple repeats:	65854	2769788	0.0041	58858	2469014	0.0041	36684	1672723	0.0031	54838	2234564	0.0038
	Low complexity:	11536	580330	0.0009	11016	564885	0.0009	7443	364431	0.0007	9992	510175	0.0009
	*most repeats fragmented by insertions or deletions have been counted as one element
	**Mirage, P-element, Transib
	Table S8: Repetitive element statistics for Pinguicula gigantea and Pinguicula assemblies scaffolded using RagTag.
\

## Sheet: Table S9
	Enzyme	Cysteine protease	Aspartic protease	Peroxidase 10-like	Peroxidase	Esterase/lipase
	Search query	BAW35427.1	BAD07475.1, GAV80475.1	KZV23101.1	BAM28609.1	XP_004232991.1
	Tandems	Pgig_chr8.218	Pgig_chr3.179	Pgig_chr1.580	Pgig_chr1.580	Pgig_chr4.1219
		Pgig_chr8.219	Pgig_chr3.180	Pgig_chr1.581	Pgig_chr1.581	Pgig_chr4.1220
		Pgig_chr8.220	Pgig_chr3.210	Pgig_chr1.583	Pgig_chr1.583	Pgig_chr4.1221
		Pgig_chr8.221	Pgig_chr3.211	Pgig_chr1.584	Pgig_chr1.584	Pgig_chr4.1226
		Pgig_chr8.223	Pgig_chr4.193	Pgig_chr1.586	Pgig_chr1.586	Pgig_chr5.3752
		Pgig_chr8.224	Pgig_chr4.195	Pgig_chr3.423	Pgig_chr3.423	Pgig_chr5.3755
		Pgig_chr8.225	Pgig_chr4.196	Pgig_chr3.424	Pgig_chr3.424	Pgig_chr5.3756
		Pgig_chr8.226	Pgig_chr6.1116	Pgig_chr3.425	Pgig_chr3.425	Pgig_chr8.485
		Pgig_chr8.227	Pgig_chr6.1120	Pgig_chr3.429	Pgig_chr3.429	Pgig_chr8.491
		Pgig_chr8.228	Pgig_chr6.1124	Pgig_chr3.430	Pgig_chr3.430	Pgig_chr8.493
		Pgig_chr8.229	Pgig_chr10.1640	Pgig_chr3.431	Pgig_chr3.431	Pgig_chr8.503
		Pgig_chr8.231	Pgig_chr10.1643	Pgig_chr3.432	Pgig_chr3.432	Pgig_chr8.523
		Pgig_chr8.234	Pgig_chr10.1650	Pgig_chr8.340	Pgig_chr8.340	Pgig_chr8.524
		Pgig_chr8.235		Pgig_chr8.341	Pgig_chr8.341	Pgig_chr10.1521
		Pgig_chr8.237		Pgig_chr8.342	Pgig_chr8.342	Pgig_chr10.1522
		Pgig_chr8.238		Pgig_chr8.351	Pgig_chr8.351	Pgig_chr10.1525
		Pgig_chr8.241		Pgig_chr8.352	Pgig_chr8.352	Pgig_chr10.1526
		Pgig_chr8.242		Pgig_chr8.354	Pgig_chr8.354	Pgig_chr11.1760
				Pgig_chr8.355	Pgig_chr8.355	Pgig_chr11.1761
				Pgig_chr8.356	Pgig_chr8.356	Pgig_chr11.1763
				Pgig_chr8.357	Pgig_chr8.357	Pgig_chr11.3973
				Pgig_chr10.591	Pgig_chr10.591	Pgig_chr11.3974
				Pgig_chr10.592	Pgig_chr10.592	Pgig_chr11.3977
				Pgig_chr10.593	Pgig_chr10.593	Pgig_chr11.3978
				Pgig_chr10.617	Pgig_chr10.617	Pgig_chr11.3979
				Pgig_chr10.618	Pgig_chr10.618	Pgig_chr11.3980
				Pgig_chr10.619	Pgig_chr10.619	Pgig_chr11.3982
						Pgig_chr11.3983
	Table S9: Tandem duplications of three or more putitive digestive enzymes in Pinguicula gigantea.

## Sheet: Table S10
	species	ascession	Family		Domain								Homologous Superfamily						Active Site			Conserved Site	Source
			IPR013128	IPR005688	IPR013201	IPR000668	IPR039417	IPR000010	IPR006703	IPR000626	IPR002906	IPR019956	IPR038765	IPR046350	IPR027417	IPR038582	IPR011332	IPR029071	IPR025660	IPR025661	IPR000169	IPR019954
	Arabidopsis thaliana	AT5G45890.1	✓	✕	✓	✓	✓	✕	✕	✕	✕	✕	✓	✕	✕	✕	✕	✕	✓	✓	✓	✕	TAIR: The Arabidopsis Information Resource (TAIR). 2019 05/01/2022]; Available from: https://www.arabidopsis.org/download/index-auto.jsp%3Fdir%3D%252Fdownload_files%252FGenes%252FTAIR10_genome_release on www.arabidopsis.org, 05/01/2022
	Drosera adelae	BAW35427.1	✓	✕	✓	✓	✓	✕	✕	✕	✕	✕	✓	✕	✕	✕	✕	✕	✕	✓	✓	✕	Fukushima, K., Fang, X., Alvarez-Ponce, D., Cai, H., Carretero-Paulet, L., Chen, C., Chang, T.H., Farr, K.M., Fujita, T., Hiwatashi, Y. and Hoshi, Y., 2017. Genome of the pitcher plant Cephalotus reveals genetic changes associated with carnivory. Nature Ecology & Evolution, 1(3), p.0059.
	Pinguicula gigantea	Pgig_chr5.3731	✓	✕	✓	✓	✓	✕	✕	✕	✕	✕	✓	✕	✕	✕	✕	✕	✓	✓	✕	✕	This study
	Pinguicula gigantea	Pgig_chr8.231	✓	✕	✓	✓	✓	✕	✕	✕	✕	✕	✓	✕	✕	✕	✕	✕	✓	✓	✕	✕	This study
	Pinguicula gigantea	Pgig_chr8.234	✓	✕	✓	✓	✓	✕	✕	✕	✕	✕	✓	✕	✕	✕	✕	✕	✓	✓	✕	✕	This study
	Pinguicula gigantea	Pgig_chr8.237	✓	✕	✓	✓	✓	✕	✕	✕	✕	✕	✓	✕	✕	✕	✕	✕	✓	✓	✕	✕	This study
	Pinguicula gigantea	Pgig_chr8.241	✓	✕	✓	✓	✓	✕	✕	✕	✕	✕	✓	✕	✕	✕	✕	✕	✓	✓	✕	✕	This study
	Pinguicula gigantea	Pgig_chr8.220	✓	✕	✓	✓	✓	✕	✕	✕	✕	✕	✓	✕	✕	✕	✕	✕	✓	✕	✓	✕	This study
	Pinguicula gigantea	Pgig_chr8.242	✓	✕	✓	✓	✓	✕	✕	✕	✕	✕	✓	✕	✕	✕	✕	✕	✓	✕	✕	✕	This study
	Pinguicula gigantea	Pgig_chr8.228	✓	✕	✓	✓	✓	✓	✕	✕	✕	✕	✓	✓	✕	✕	✕	✕	✕	✕	✓	✕	This study
	Pinguicula gigantea	Pgig_chr8.224	✓	✕	✓	✕	✕	✕	✕	✕	✕	✕	✓	✕	✕	✕	✕	✕	✕	✕	✕	✕	This study
	Pinguicula gigantea	Pgig_chr8.227	✓	✕	✕	✓	✓	✓	✕	✕	✕	✕	✓	✓	✕	✕	✕	✕	✕	✕	✓	✕	This study
	Pinguicula gigantea	Pgig_chr8.223	✓	✕	✕	✓	✕	✓	✕	✕	✕	✕	✓	✓	✕	✕	✕	✕	✓	✓	✕	✕	This study
	Pinguicula gigantea	Pgig_chr8.226	✓	✕	✕	✓	✕	✕	✕	✕	✕	✕	✓	✕	✕	✕	✕	✕	✓	✓	✕	✕	This study
	Pinguicula gigantea	Pgig_chr5.3730	✕	✕	✓	✓	✕	✕	✕	✕	✕	✕	✓	✕	✕	✕	✕	✕	✕	✕	✕	✕	This study
	Pinguicula gigantea	Pgig_chr8.221	✕	✕	✓	✕	✕	✕	✕	✕	✕	✕	✓	✕	✕	✕	✕	✕	✕	✕	✕	✕	This study
	Pinguicula gigantea	Pgig_chr8.229	✕	✕	✓	✕	✕	✕	✕	✕	✕	✕	✓	✕	✕	✕	✕	✕	✕	✕	✕	✕	This study
	Pinguicula gigantea	Pgig_chr8.235	✕	✕	✓	✕	✕	✕	✕	✕	✕	✕	✓	✕	✕	✕	✕	✕	✕	✕	✕	✕	This study
	Pinguicula gigantea	Pgig_chr8.238	✕	✕	✓	✕	✕	✕	✕	✕	✕	✕	✓	✕	✕	✕	✕	✕	✕	✕	✕	✕	This study
	Pinguicula gigantea	Pgig_chr8.218	✕	✕	✕	✕	✕	✕	✕	✕	✕	✕	✕	✕	✕	✕	✕	✕	✕	✕	✕	✕	This study
	Pinguicula gigantea	Pgig_chr8.219	✕	✕	✕	✕	✕	✕	✕	✕	✕	✕	✕	✕	✕	✕	✕	✕	✕	✕	✕	✕	This study
	Pinguicula gigantea	Pgig_chr8.225	✕	✕	✕	✕	✕	✓	✕	✕	✕	✕	✕	✓	✕	✕	✕	✕	✕	✕	✕	✕	This study
	Utricularia gibba	Ugib.unitig_578.g16406.t1	✓	✕	✓	✓	✓	✕	✕	✕	✕	✕	✓	✕	✕	✕	✕	✕	✓	✓	✓	✕	Lan, T., Renner, T., Ibarra-Laclette, E., Farr, K.M., Chang, T.H., Cervantes-Pérez, S.A., Zheng, C., Sankoff, D., Tang, H., Purbojati, R.W. and Putra, A., 2017. Long-read sequencing uncovers the adaptive topography of a carnivorous plant genome. Proceedings of the National Academy of Sciences, 114(22), pp.E4435-E4441.
	Utricularia gibba	Ugib.unitig_578.g16411.t1	✓	✕	✓	✓	✓	✕	✕	✕	✕	✕	✓	✕	✕	✕	✕	✕	✓	✓	✓	✕	Lan, T., Renner, T., Ibarra-Laclette, E., Farr, K.M., Chang, T.H., Cervantes-Pérez, S.A., Zheng, C., Sankoff, D., Tang, H., Purbojati, R.W. and Putra, A., 2017. Long-read sequencing uncovers the adaptive topography of a carnivorous plant genome. Proceedings of the National Academy of Sciences, 114(22), pp.E4435-E4441.
	Utricularia gibba	Ugib.unitig_578.g16446.t1	✓	✕	✓	✓	✓	✕	✕	✕	✕	✕	✓	✕	✕	✕	✕	✕	✓	✓	✓	✕	Lan, T., Renner, T., Ibarra-Laclette, E., Farr, K.M., Chang, T.H., Cervantes-Pérez, S.A., Zheng, C., Sankoff, D., Tang, H., Purbojati, R.W. and Putra, A., 2017. Long-read sequencing uncovers the adaptive topography of a carnivorous plant genome. Proceedings of the National Academy of Sciences, 114(22), pp.E4435-E4441.
	Utricularia gibba	Ugib.unitig_578.g16450.t1	✓	✕	✓	✓	✓	✕	✕	✕	✕	✕	✓	✕	✕	✕	✕	✕	✓	✓	✓	✕	Lan, T., Renner, T., Ibarra-Laclette, E., Farr, K.M., Chang, T.H., Cervantes-Pérez, S.A., Zheng, C., Sankoff, D., Tang, H., Purbojati, R.W. and Putra, A., 2017. Long-read sequencing uncovers the adaptive topography of a carnivorous plant genome. Proceedings of the National Academy of Sciences, 114(22), pp.E4435-E4441.
	Utricularia gibba	Ugib.unitig_699.g19346.t1	✓	✕	✓	✓	✓	✕	✕	✕	✕	✕	✓	✕	✕	✕	✕	✕	✓	✓	✓	✕	Lan, T., Renner, T., Ibarra-Laclette, E., Farr, K.M., Chang, T.H., Cervantes-Pérez, S.A., Zheng, C., Sankoff, D., Tang, H., Purbojati, R.W. and Putra, A., 2017. Long-read sequencing uncovers the adaptive topography of a carnivorous plant genome. Proceedings of the National Academy of Sciences, 114(22), pp.E4435-E4441.
	Utricularia gibba	Ugib.unitig_699.g19351.t1	✓	✕	✓	✓	✓	✕	✕	✕	✕	✕	✓	✕	✕	✕	✕	✕	✓	✓	✓	✕	Lan, T., Renner, T., Ibarra-Laclette, E., Farr, K.M., Chang, T.H., Cervantes-Pérez, S.A., Zheng, C., Sankoff, D., Tang, H., Purbojati, R.W. and Putra, A., 2017. Long-read sequencing uncovers the adaptive topography of a carnivorous plant genome. Proceedings of the National Academy of Sciences, 114(22), pp.E4435-E4441.
	Utricularia gibba	Ugib.unitig_699.g19352.t1	✓	✕	✓	✓	✓	✕	✕	✕	✕	✕	✓	✕	✕	✕	✕	✕	✓	✓	✓	✕	Lan, T., Renner, T., Ibarra-Laclette, E., Farr, K.M., Chang, T.H., Cervantes-Pérez, S.A., Zheng, C., Sankoff, D., Tang, H., Purbojati, R.W. and Putra, A., 2017. Long-read sequencing uncovers the adaptive topography of a carnivorous plant genome. Proceedings of the National Academy of Sciences, 114(22), pp.E4435-E4441.
	Utricularia gibba	Ugib.unitig_699.g19355.t1	✓	✕	✓	✓	✓	✕	✕	✕	✕	✕	✓	✕	✕	✕	✕	✕	✓	✓	✓	✕	Lan, T., Renner, T., Ibarra-Laclette, E., Farr, K.M., Chang, T.H., Cervantes-Pérez, S.A., Zheng, C., Sankoff, D., Tang, H., Purbojati, R.W. and Putra, A., 2017. Long-read sequencing uncovers the adaptive topography of a carnivorous plant genome. Proceedings of the National Academy of Sciences, 114(22), pp.E4435-E4441.
	Utricularia gibba	Ugib.unitig_699.g19358.t1	✓	✕	✓	✓	✓	✕	✕	✕	✕	✕	✓	✕	✕	✕	✕	✕	✓	✓	✓	✕	Lan, T., Renner, T., Ibarra-Laclette, E., Farr, K.M., Chang, T.H., Cervantes-Pérez, S.A., Zheng, C., Sankoff, D., Tang, H., Purbojati, R.W. and Putra, A., 2017. Long-read sequencing uncovers the adaptive topography of a carnivorous plant genome. Proceedings of the National Academy of Sciences, 114(22), pp.E4435-E4441.
	Utricularia gibba	Ugib.unitig_699.g19359.t1	✓	✕	✓	✓	✓	✕	✕	✕	✕	✕	✓	✕	✕	✕	✕	✕	✓	✓	✓	✕	Lan, T., Renner, T., Ibarra-Laclette, E., Farr, K.M., Chang, T.H., Cervantes-Pérez, S.A., Zheng, C., Sankoff, D., Tang, H., Purbojati, R.W. and Putra, A., 2017. Long-read sequencing uncovers the adaptive topography of a carnivorous plant genome. Proceedings of the National Academy of Sciences, 114(22), pp.E4435-E4441.
	Utricularia gibba	Ugib.unitig_8.g4663.t1	✓	✕	✓	✓	✓	✕	✕	✕	✕	✕	✓	✕	✕	✕	✕	✕	✓	✓	✓	✕	Lan, T., Renner, T., Ibarra-Laclette, E., Farr, K.M., Chang, T.H., Cervantes-Pérez, S.A., Zheng, C., Sankoff, D., Tang, H., Purbojati, R.W. and Putra, A., 2017. Long-read sequencing uncovers the adaptive topography of a carnivorous plant genome. Proceedings of the National Academy of Sciences, 114(22), pp.E4435-E4441.
	Utricularia gibba	Ugib.unitig_85.g27169.t1	✓	✓	✓	✓	✓	✕	✓	✕	✕	✕	✓	✕	✓	✕	✕	✕	✓	✓	✓	✕	Lan, T., Renner, T., Ibarra-Laclette, E., Farr, K.M., Chang, T.H., Cervantes-Pérez, S.A., Zheng, C., Sankoff, D., Tang, H., Purbojati, R.W. and Putra, A., 2017. Long-read sequencing uncovers the adaptive topography of a carnivorous plant genome. Proceedings of the National Academy of Sciences, 114(22), pp.E4435-E4441.
	Utricularia gibba	Ugib.unitig_85.g27287.t1	✓	✕	✓	✓	✓	✕	✕	✕	✕	✕	✓	✕	✕	✕	✕	✕	✓	✓	✓	✕	Lan, T., Renner, T., Ibarra-Laclette, E., Farr, K.M., Chang, T.H., Cervantes-Pérez, S.A., Zheng, C., Sankoff, D., Tang, H., Purbojati, R.W. and Putra, A., 2017. Long-read sequencing uncovers the adaptive topography of a carnivorous plant genome. Proceedings of the National Academy of Sciences, 114(22), pp.E4435-E4441.
	Utricularia gibba	Ugib.unitig_85.g27288.t1	✓	✕	✓	✓	✓	✕	✕	✕	✕	✕	✓	✕	✕	✕	✕	✕	✓	✓	✓	✕	Lan, T., Renner, T., Ibarra-Laclette, E., Farr, K.M., Chang, T.H., Cervantes-Pérez, S.A., Zheng, C., Sankoff, D., Tang, H., Purbojati, R.W. and Putra, A., 2017. Long-read sequencing uncovers the adaptive topography of a carnivorous plant genome. Proceedings of the National Academy of Sciences, 114(22), pp.E4435-E4441.
	Utricularia gibba	Ugib.unitig_85.g27291.t1	✓	✕	✓	✓	✓	✕	✕	✕	✕	✕	✓	✕	✕	✕	✕	✕	✓	✓	✓	✕	Lan, T., Renner, T., Ibarra-Laclette, E., Farr, K.M., Chang, T.H., Cervantes-Pérez, S.A., Zheng, C., Sankoff, D., Tang, H., Purbojati, R.W. and Putra, A., 2017. Long-read sequencing uncovers the adaptive topography of a carnivorous plant genome. Proceedings of the National Academy of Sciences, 114(22), pp.E4435-E4441.
	Utricularia gibba	Ugib.unitig_85.g27292.t1	✓	✕	✓	✓	✓	✕	✕	✕	✕	✕	✓	✕	✕	✕	✕	✕	✓	✓	✓	✕	Lan, T., Renner, T., Ibarra-Laclette, E., Farr, K.M., Chang, T.H., Cervantes-Pérez, S.A., Zheng, C., Sankoff, D., Tang, H., Purbojati, R.W. and Putra, A., 2017. Long-read sequencing uncovers the adaptive topography of a carnivorous plant genome. Proceedings of the National Academy of Sciences, 114(22), pp.E4435-E4441.
	Utricularia gibba	Ugib.unitig_699.g19348.t1	✓	✕	✓	✓	✓	✕	✕	✕	✕	✕	✓	✕	✕	✕	✕	✕	✓	✓	✕	✕	Lan, T., Renner, T., Ibarra-Laclette, E., Farr, K.M., Chang, T.H., Cervantes-Pérez, S.A., Zheng, C., Sankoff, D., Tang, H., Purbojati, R.W. and Putra, A., 2017. Long-read sequencing uncovers the adaptive topography of a carnivorous plant genome. Proceedings of the National Academy of Sciences, 114(22), pp.E4435-E4441.
	Utricularia gibba	Ugib.unitig_699.g19347.t1	✓	✕	✓	✓	✓	✕	✕	✕	✕	✕	✓	✕	✕	✕	✕	✕	✓	✕	✓	✕	Lan, T., Renner, T., Ibarra-Laclette, E., Farr, K.M., Chang, T.H., Cervantes-Pérez, S.A., Zheng, C., Sankoff, D., Tang, H., Purbojati, R.W. and Putra, A., 2017. Long-read sequencing uncovers the adaptive topography of a carnivorous plant genome. Proceedings of the National Academy of Sciences, 114(22), pp.E4435-E4441.
	Utricularia gibba	Ugib.unitig_699.g19345.t1	✓	✕	✓	✓	✓	✕	✕	✕	✕	✕	✓	✕	✕	✕	✕	✕	✕	✓	✓	✕	Lan, T., Renner, T., Ibarra-Laclette, E., Farr, K.M., Chang, T.H., Cervantes-Pérez, S.A., Zheng, C., Sankoff, D., Tang, H., Purbojati, R.W. and Putra, A., 2017. Long-read sequencing uncovers the adaptive topography of a carnivorous plant genome. Proceedings of the National Academy of Sciences, 114(22), pp.E4435-E4441.
	Utricularia gibba	Ugib.unitig_85.g27286.t1	✓	✕	✓	✓	✓	✕	✕	✕	✕	✕	✓	✕	✕	✕	✕	✕	✕	✓	✓	✕	Lan, T., Renner, T., Ibarra-Laclette, E., Farr, K.M., Chang, T.H., Cervantes-Pérez, S.A., Zheng, C., Sankoff, D., Tang, H., Purbojati, R.W. and Putra, A., 2017. Long-read sequencing uncovers the adaptive topography of a carnivorous plant genome. Proceedings of the National Academy of Sciences, 114(22), pp.E4435-E4441.
	Utricularia gibba	Ugib.unitig_699.g19350.t1	✓	✕	✓	✓	✓	✕	✕	✕	✕	✕	✓	✕	✕	✕	✕	✕	✕	✕	✕	✕	Lan, T., Renner, T., Ibarra-Laclette, E., Farr, K.M., Chang, T.H., Cervantes-Pérez, S.A., Zheng, C., Sankoff, D., Tang, H., Purbojati, R.W. and Putra, A., 2017. Long-read sequencing uncovers the adaptive topography of a carnivorous plant genome. Proceedings of the National Academy of Sciences, 114(22), pp.E4435-E4441.
	Utricularia gibba	Ugib.unitig_699.g19360.t1	✓	✕	✓	✓	✓	✕	✕	✕	✕	✕	✓	✕	✕	✕	✕	✕	✕	✕	✕	✕	Lan, T., Renner, T., Ibarra-Laclette, E., Farr, K.M., Chang, T.H., Cervantes-Pérez, S.A., Zheng, C., Sankoff, D., Tang, H., Purbojati, R.W. and Putra, A., 2017. Long-read sequencing uncovers the adaptive topography of a carnivorous plant genome. Proceedings of the National Academy of Sciences, 114(22), pp.E4435-E4441.
	Utricularia gibba	Ugib.unitig_578.g16448.t1	✓	✕	✕	✓	✓	✕	✕	✕	✕	✕	✓	✕	✕	✕	✕	✕	✓	✓	✕	✕	Lan, T., Renner, T., Ibarra-Laclette, E., Farr, K.M., Chang, T.H., Cervantes-Pérez, S.A., Zheng, C., Sankoff, D., Tang, H., Purbojati, R.W. and Putra, A., 2017. Long-read sequencing uncovers the adaptive topography of a carnivorous plant genome. Proceedings of the National Academy of Sciences, 114(22), pp.E4435-E4441.
	Utricularia gibba	Ugib.unitig_8.g4660.t1	✓	✕	✕	✓	✓	✕	✕	✕	✕	✕	✓	✕	✕	✕	✕	✕	✓	✕	✕	✕	Lan, T., Renner, T., Ibarra-Laclette, E., Farr, K.M., Chang, T.H., Cervantes-Pérez, S.A., Zheng, C., Sankoff, D., Tang, H., Purbojati, R.W. and Putra, A., 2017. Long-read sequencing uncovers the adaptive topography of a carnivorous plant genome. Proceedings of the National Academy of Sciences, 114(22), pp.E4435-E4441.
	Utricularia gibba	Ugib.unitig_85.g27289.t1	✓	✕	✕	✓	✓	✕	✕	✕	✕	✕	✓	✕	✕	✕	✕	✕	✓	✕	✕	✕	Lan, T., Renner, T., Ibarra-Laclette, E., Farr, K.M., Chang, T.H., Cervantes-Pérez, S.A., Zheng, C., Sankoff, D., Tang, H., Purbojati, R.W. and Putra, A., 2017. Long-read sequencing uncovers the adaptive topography of a carnivorous plant genome. Proceedings of the National Academy of Sciences, 114(22), pp.E4435-E4441.
	Utricularia gibba	Ugib.unitig_578.g16650.t1	✓	✕	✕	✓	✕	✕	✕	✕	✕	✕	✓	✕	✕	✕	✕	✕	✓	✕	✓	✕	Lan, T., Renner, T., Ibarra-Laclette, E., Farr, K.M., Chang, T.H., Cervantes-Pérez, S.A., Zheng, C., Sankoff, D., Tang, H., Purbojati, R.W. and Putra, A., 2017. Long-read sequencing uncovers the adaptive topography of a carnivorous plant genome. Proceedings of the National Academy of Sciences, 114(22), pp.E4435-E4441.
	Utricularia gibba	Ugib.unitig_85.g27192.t1	✓	✕	✕	✓	✕	✕	✕	✓	✓	✓	✓	✕	✕	✓	✓	✓	✓	✕	✕	✓	Lan, T., Renner, T., Ibarra-Laclette, E., Farr, K.M., Chang, T.H., Cervantes-Pérez, S.A., Zheng, C., Sankoff, D., Tang, H., Purbojati, R.W. and Putra, A., 2017. Long-read sequencing uncovers the adaptive topography of a carnivorous plant genome. Proceedings of the National Academy of Sciences, 114(22), pp.E4435-E4441.
	Utricularia gibba	Ugib.unitig_8.g4661.t1	✕	✕	✓	✕	✕	✕	✕	✕	✕	✕	✓	✕	✕	✕	✕	✕	✕	✕	✕	✕	Lan, T., Renner, T., Ibarra-Laclette, E., Farr, K.M., Chang, T.H., Cervantes-Pérez, S.A., Zheng, C., Sankoff, D., Tang, H., Purbojati, R.W. and Putra, A., 2017. Long-read sequencing uncovers the adaptive topography of a carnivorous plant genome. Proceedings of the National Academy of Sciences, 114(22), pp.E4435-E4441.
	Utricularia gibba	Ugib.unitig_85.g27290.t1	✕	✕	✓	✕	✕	✕	✕	✕	✕	✕	✓	✕	✕	✕	✕	✕	✕	✕	✕	✕	Lan, T., Renner, T., Ibarra-Laclette, E., Farr, K.M., Chang, T.H., Cervantes-Pérez, S.A., Zheng, C., Sankoff, D., Tang, H., Purbojati, R.W. and Putra, A., 2017. Long-read sequencing uncovers the adaptive topography of a carnivorous plant genome. Proceedings of the National Academy of Sciences, 114(22), pp.E4435-E4441.
	Utricularia gibba	Ugib.unitig_85.g27294.t1	✕	✕	✓	✕	✕	✕	✕	✕	✕	✕	✓	✕	✕	✕	✕	✕	✕	✕	✕	✕	Lan, T., Renner, T., Ibarra-Laclette, E., Farr, K.M., Chang, T.H., Cervantes-Pérez, S.A., Zheng, C., Sankoff, D., Tang, H., Purbojati, R.W. and Putra, A., 2017. Long-read sequencing uncovers the adaptive topography of a carnivorous plant genome. Proceedings of the National Academy of Sciences, 114(22), pp.E4435-E4441.
	Table S10: InterPro domain presence or absense for cysteine protease proteins.

[truncated: 2 more sheets: Table S11, Table S12]
